# Supplementary material
Source: PubMed Central journal article supplement (PMC6004560)
Supplement: jnm198929SupplementaryData.pdf [file jnm198929SupplementaryData.pdf]

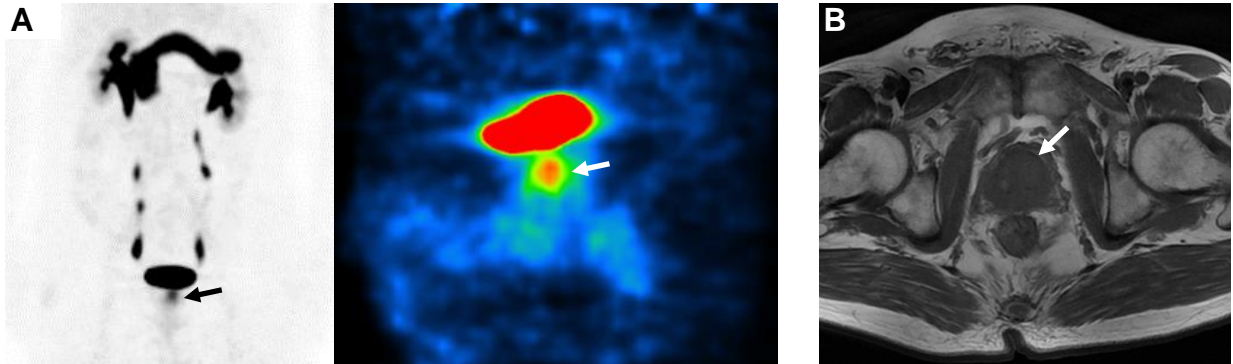

**SUPPLEMENTAL FIGURE 1.** (A)  $^{68}\text{Ga}$ -RM26 PET of a 69-year-old man with newly diagnosed prostate cancer by biopsy (PSA-T = 16.28 ng/ml), with strong localized tracer accumulation with SUVmax of 7.01 in primary prostate-confined lesions. (B) Contrast enhanced MRI detected abnormal signal in bilateral lobes and central gland. This patient underwent radical prostatectomy in one week with confirmed postoperative pathology of prostate cancer (Gleason score=3+4).

**SUPPLEMENTAL TABLE 1.** Demographics of patients with newly diagnosed prostate cancer

| No. | Age (yr) | PSA-T (ng/ml) | PSA-F (ng/ml) | F/T   | GS  | gland involvement | Clinical stage | D'Amico classification | MRI        | Bone scan | <sup>68</sup> Ga-RM26 PET/CT | mLNs                 | <sup>68</sup> Ga-BBN PET/CT |
|-----|----------|---------------|---------------|-------|-----|-------------------|----------------|------------------------|------------|-----------|------------------------------|----------------------|-----------------------------|
| 1   | 72       | 263.60        | 45.78         | 0.17  | 4+4 | 18%               | T2a            | H-risk                 | PT         | (-)       | PT                           |                      | PT                          |
| 2   | 59       | 5.01          | 0.37          | 0.07  | 4+3 | 11%               | T2a            | I-risk                 | (-)        | (-)       | PT                           |                      |                             |
| 3   | 69       | 16.28         | 0.81          | 0.05  | 3+4 | 37%               | T2b            | I-risk                 | PT         | (-)       | PT                           |                      |                             |
| 4   | 79       | 7.51          | 0.66          | 0.09  | 3+3 | 18%               | T1c            | L-risk                 | (-)        | (-)       | (-)                          |                      | (-)                         |
| 5   | 64       | 278.10        | >50           | >0.18 | 5+3 | 25%               | T3b            | H-risk                 | (-)        | (+/-)     | PT/BM                        |                      | PT/BM                       |
| 6   | 78       | 13.10         | 0.98          | 0.08  | 4+4 | 12%               | T2a            | H-risk                 | (-)        | (+/-)     | (-)                          |                      | (-)                         |
| 7   | 68       | 28.70         | 4.12          | 0.14  | 5+3 | 19%               | T2a            | H-risk                 | PT         | (+/-)     | PT                           |                      |                             |
| 8   | 57       | 6.64          | 1.18          | 0.17  | 4+5 | 41%               | T3b            | H-risk                 | PT         | (+/-)     | PT/BM                        |                      | (-)                         |
| 9   | 73       | 15.00         | 1.04          | 0.07  | 4+3 | 35%               | T2c            | I-risk                 | PT/<br>LNs | (+/-)     | PT/ LNs/BM                   | 11, 0.8-<br>3.3, 4.1 | PT/ LNs/BM                  |
| 10  | 61       | 10.00         | 0.85          | 0.09  | 3+3 | 15%               | T2a            | I-risk                 | PT/ LN     | (-)       | PT/ LN                       | 5, 1.1-2.3,<br>9.2   |                             |
| 11  | 69       | 13.39         | 0.79          | 0.06  | 4+3 | 10%               | T1c            | I-risk                 | (-)        | (+/-)     | PT                           |                      |                             |
| 12  | 75       | 7.80          | 0.55          | 0.07  | 4+4 | 11%               | T2a            | H-risk                 | PT         | (+/-)     | PT                           |                      |                             |
| 13  | 61       | 18.99         | 0.97          | 0.05  | 4+3 | 33%               | T2c            | I-risk                 | PT         | (-)       | PT                           |                      | (-)                         |
| 14  | 66       | 25.06         | 2.88          | 0.11  | 4+3 | 17%               | T2a            | H-risk                 | PT         | (-)       | PT                           |                      | PT                          |
| 15  | 69       | 193.10        | 32.70         | 0.17  | 5+5 | 17%               | T3b            | H-risk                 | PT/<br>LNs | (+)       | PT/ LNs/BM                   | 3, 1.1-1.8,<br>4.7   | PT/ LNs/BM                  |
| 16  | 69       | 15.30         | 2.90          | 0.19  | 4+3 | 20%               | T3b            | I-risk                 | PT         | (-)       | PT                           |                      | (-)                         |
| 17  | 73       | 28.71         | 4.12          | 0.14  | 5+3 | 18%               | T2a            | H-risk                 | PT         | (-)       | PT                           |                      | (-)                         |

PSA = prostate-specific antigen; PSA-T = total prostate-specific antigen; PSA-F = free prostate-specific antigen; F/T = free/total PSA ratio; GS = Gleason score; PT = primary tumor; LNs = lymph nodes involvement; BM = bone metastasis; ; H-risk = high risk; I-risk = intermediate risk; L-risk = low risk; mLNs (number, size (cm), SUVmax) = metastatic lymph nodes

**SUPPLEMENTAL TABLE 2.** Demographics of patients with biomedical recurrent (BCR) prostate cancer (AUA/ASTRO criteria)

| No. | Age (yr) | PSA-T <sup>1</sup> (ng/ml) | Initial GS | CAPRA score | Treatment | PSAn (ng/ml) | PSA-T <sup>2</sup> (ng/ml) | Interval (months) | CT  | MRI | Bone Scan | <sup>68</sup> Ga-RM26 PET/CT | mLNs             | <sup>68</sup> Ga-BBN PET/CT |
|-----|----------|----------------------------|------------|-------------|-----------|--------------|----------------------------|-------------------|-----|-----|-----------|------------------------------|------------------|-----------------------------|
| 18  | 71       | 114.5                      | 4+5        | H-risk      | BT+ADT    | 0.40         | 997.1                      | 1.0               | (+) | (+) | (+)       | LN/BM                        | 4, 0.8-1.3, 2.01 | BM                          |
| 19  | 75       | 45.00                      | 5+3        | H-risk      | RP        | 0.01         | 771.8                      | 36.0              | (+) | /   | (+)       | BM                           |                  | BM                          |
| 20  | 73       | 50.80                      | 4+4        | H-risk      | RP+RT+ADT | 0.01         | 62.56                      | 1.9               | /   | (+) | (-)       | LN/BM                        | 2, 1.7-1.8, 4.10 | LN/BM                       |
| 21  | 62       | 79.90                      | 5+3        | H-risk      | RT+ADT    | 0.51         | 36.00                      | 1.3               | (-) | (+) | (+/-)     | BM                           |                  | BM                          |
| 22  | 59       | 5.73                       | 4+4        | I-risk      | RT        | 0.2          | 29.50                      | 7.0               | /   | (+) | (+/-)     | BM                           |                  | (-)                         |
| 23  | 68       | 1.39                       | 3+4        | I-risk      | RP        | 0.01         | 72.04                      | 96.0              | (-) | /   | (+)       | (-)                          |                  | (-)                         |
| 24  | 73       | 15.58                      | 4+5        | H-risk      | RT+ADT    | 2.4          | 35.61                      | 1.7               | /   | (+) | (+)       | (LN/BM)                      | 2, 3.1-3.3, 5.35 | (-)                         |
| 25  | 73       | 38.05                      | 5+3        | H-risk      | BT+ADT    | 1.4          | 28.30                      | 1.7               | /   | (+) | (+/-)     | (-)                          |                  | (-)                         |
| 26  | 72       | 33.41                      | 4+5        | H-risk      | RP        | 0.18         | 119.0                      | 101.0             | (+) | (+) | (+)       | BM                           |                  | BM                          |
| 27  | 69       | 39.5                       | 4+5        | H-risk      | RP        | 0.01         | 0.76                       | 36                | /   | (-) | (-)       | (-)                          |                  | (-)                         |
| 28  | 73       | 103.0                      | 4+5        | H-risk      | RT+ADT    | 0.3          | 11.0                       | 8.0               | /   | (+) | (-)       | BM                           |                  | BM                          |

PSA-T = total prostate-specific antigen; GS = Gleason score; LNs = lymph nodes involvement; BM = bone metastasis; RP = radical prostatectomy; BT = brachytherapy; ADT = androgen-deprivation therapy; RT = radiation therapy; CT=enhanced CT; PSA-T<sup>1</sup>=pre-therapy PSA-T; PSA-T<sup>2</sup>=PSA-T before PET/CT; PSAn = PSA nadir; Interval = Interval from most recent treatment to imaging; H-risk = high risk; I-risk = intermediate risk; mLNs (number, size (cm), SUVmax) = metastatic lymph nodes

**SUPPLEMENTAL TABLE 3.** Biodistribution of  $^{68}\text{Ga}$ -RM26 in healthy volunteers (SUV, mean  $\pm$  SD, n = 5)

| Organs       | Time (min)       |                  |                   |                   |                  |                   |
|--------------|------------------|------------------|-------------------|-------------------|------------------|-------------------|
|              | 5                | 10               | 15                | 30                | 45               | 60                |
| Brain        | 0.07 $\pm$ 0.027 | 0.07 $\pm$ 0.02  | 0.06 $\pm$ 0.01   | 0.04 $\pm$ 0.01   | 0.04 $\pm$ 0.01  | 0.03 $\pm$ 0.01   |
| Heart        | 2.09 $\pm$ 0.21  | 1.97 $\pm$ 0.09  | 1.73 $\pm$ 0.15   | 1.51 $\pm$ 0.10   | 1.18 $\pm$ 0.09  | 1.08 $\pm$ 0.11   |
| Lung         | 0.67 $\pm$ 0.44  | 0.43 $\pm$ 0.03  | 0.39 $\pm$ 0.08   | 0.33 $\pm$ 0.06   | 0.28 $\pm$ 0.06  | 0.22 $\pm$ 0.03   |
| Liver        | 1.79 $\pm$ 0.21  | 1.65 $\pm$ 0.19  | 1.43 $\pm$ 0.14   | 1.26 $\pm$ 0.20   | 0.97 $\pm$ 0.13  | 0.84 $\pm$ 0.12   |
| Spleen       | 1.87 $\pm$ 0.30  | 1.72 $\pm$ 0.34  | 1.57 $\pm$ 0.30   | 1.28 $\pm$ 0.23   | 1.02 $\pm$ 0.18  | 0.92 $\pm$ 0.19   |
| Pancreas     | 20.91 $\pm$ 1.49 | 22.14 $\pm$ 1.01 | 22.17 $\pm$ 2.43  | 20.34 $\pm$ 2.54  | 17.34 $\pm$ 2.81 | 16.04 $\pm$ 2.80  |
| Kidneys      | 3.37 $\pm$ 0.40  | 3.65 $\pm$ 0.51  | 3.57 $\pm$ 0.77   | 3.24 $\pm$ 0.55   | 2.53 $\pm$ 0.40  | 2.32 $\pm$ 0.41   |
| Stomach wall | 1.74 $\pm$ 0.37  | 1.67 $\pm$ 0.41  | 1.55 $\pm$ 0.47   | 1.32 $\pm$ 0.39   | 0.98 $\pm$ 0.27  | 0.91 $\pm$ 0.29   |
| Bladder      | 23.11 $\pm$ 5.40 | 40.48 $\pm$ 4.92 | 69.70 $\pm$ 11.30 | 82.67 $\pm$ 12.77 | 83.58 $\pm$ 8.58 | 73.22 $\pm$ 16.56 |
| Red marrow   | 0.84 $\pm$ 0.16  | 0.84 $\pm$ 0.14  | 0.81 $\pm$ 0.17   | 0.69 $\pm$ 0.12   | 0.56 $\pm$ 0.09  | 0.50 $\pm$ 0.06   |
| Muscle       | 0.46 $\pm$ 0.12  | 0.43 $\pm$ 0.09  | 0.38 $\pm$ 0.08   | 0.35 $\pm$ 0.12   | 0.28 $\pm$ 0.06  | 0.23 $\pm$ 0.04   |
